# Supplementary material for: Retention of Key Characteristics of Unprocessed Chorion Tissue Resulting in a Robust Scaffold to Support Wound Healing
Source: MDPI journal article supplement (doi:10.3390/ijms242115786), 2023-10-31
Supplement: s1 [file s1]

|                                                                 |                                                                 |                                                                               |
|-----------------------------------------------------------------|-----------------------------------------------------------------|-------------------------------------------------------------------------------|
| actin filament binding [GO:0051015]                             | growth factor activity [GO:0008083]                             | positive regulation of cell population proliferation [GO:0008284]             |
| antigen binding [GO:0003823]                                    | growth factor binding [GO:0019838]                              | positive regulation of DNA-binding transcription factor activity [GO:0051091] |
| ATP binding [GO:0005524]                                        | growth hormone receptor binding [GO:0005131]                    | positive regulation of myeloid cell differentiation [GO:0045639]              |
| ATPase binding [GO:0051117]                                     | heparin binding [GO:0008201]                                    | positive regulation of peptidyl-serine phosphorylation [GO:0033138]           |
| BMP receptor binding [GO:0070700]                               | hormone activity [GO:0005179]                                   | positive regulation of peptidyl-tyrosine phosphorylation [GO:0050731]         |
| cadherin binding [GO:0045296]                                   | Hsp90 protein binding [GO:0051879]                              | positive regulation of phosphatidylinositol 3-kinase signaling [GO:0014068]   |
| calcium-dependent protein kinase C activity [GO:0004698]        | identical protein binding [GO:0042802]                          | positive regulation of protein binding [GO:0032092]                           |
| carbohydrate binding [GO:0030246]                               | immune response [GO:0006955]                                    | positive regulation of protein kinase B signaling [GO:0051897]                |
| CCR chemokine receptor binding [GO:0048020]                     | insulin receptor binding [GO:0005158]                           | positive regulation of transcription by RNA polymerase II [GO:0045944]        |
| CCR1 chemokine receptor binding [GO:0031726]                    | insulin-like growth factor binding [GO:0005520]                 | prolactin receptor binding [GO:0005148]                                       |
| CCR2 chemokine receptor binding [GO:0031727]                    | insulin-like growth factor I binding [GO:0031994]               | protease binding [GO:0002020]                                                 |
| CCR4 chemokine receptor binding [GO:0031729]                    | insulin-like growth factor II binding [GO:0031995]              | protein heterodimerization activity [GO:0046982]                              |
| CCR5 chemokine receptor binding [GO:0031730]                    | insulin-like growth factor receptor binding [GO:0005159]        | protein homodimerization activity [GO:0042803]                                |
| CD4 receptor binding [GO:0042609]                               | integrin binding [GO:0005178]                                   | protein kinase activity [GO:0004672]                                          |
| cellular response to cytokine stimulus [GO:0071345]             | interleukin-1 receptor antagonist activity [GO:0005152]         | protein phosphatase binding [GO:0019903]                                      |
| cellular response to lipopolysaccharide [GO:0071222]            | interleukin-1 receptor binding [GO:0005149]                     | protein self-association [GO:0043621]                                         |
| chemoattractant activity [GO:0042056]                           | interleukin-1 type I receptor antagonist activity [GO:0045352]  | protein tyrosine kinase activator activity [GO:0030296]                       |
| chemokine activity [GO:0008009]                                 | interleukin-1 type II receptor antagonist activity [GO:0045353] | protein tyrosine kinase activity [GO:0004713]                                 |
| chemoattractant activity involved in axon guidance [GO:1902379] | interleukin-1, type I receptor binding [GO:0005150]             | protein tyrosine phosphatase activator activity [GO:0008160]                  |
| chemokine activity [GO:0008009]                                 | interleukin-1, type II receptor binding [GO:0005151]            | protein-containing complex binding [GO:0044877]                               |
| chemokine binding [GO:0019956]                                  | interleukin-12 alpha subunit binding [GO:0042164]               | receptor ligand activity [GO:0048018]                                         |
| chemokine receptor antagonist activity [GO:0046817]             | interleukin-12 receptor binding [GO:0005143]                    | receptor signaling protein tyrosine kinase activator activity [GO:0030298]    |
| chemokine receptor binding [GO:0042379]                         | interleukin-2 receptor binding [GO:0005134]                     | receptor tyrosine kinase binding [GO:0030971]                                 |
| chromatin binding [GO:0003682]                                  | interleukin-5 receptor binding [GO:0005137]                     | receptor-receptor interaction [GO:0090722]                                    |

|                                                                                |                                                                     |                                                                                |
|--------------------------------------------------------------------------------|---------------------------------------------------------------------|--------------------------------------------------------------------------------|
| collagen binding [GO:0005518]                                                  | interleukin-6 receptor binding [GO:0005138]                         | regulation of actin filament organization [GO:0110053]                         |
| copper ion binding [GO:0005507]                                                | interleukin-7 receptor binding [GO:0005139]                         | response to ethanol [GO:0045471]                                               |
| coreceptor activity [GO:0015026]                                               | interleukin-8 receptor binding [GO:0005153]                         | signaling receptor activity [GO:0038023]                                       |
| co-receptor binding [GO:0039706]                                               | kappa-type opioid receptor binding [GO:0031851]                     | signaling receptor binding [GO:0005102]                                        |
| CXCR chemokine receptor binding [GO:0045236]                                   | kinase activator activity [GO:0019209]                              | superoxide-generating NADPH oxidase activator activity [GO:0016176]            |
| CXCR3 chemokine receptor binding [GO:0048248]                                  | kinase activity [GO:0016301]                                        | transcription cis-regulatory region binding [GO:0000976]                       |
| cytokine activity [GO:0005125]                                                 | kinase binding [GO:0019900]                                         | transforming growth factor beta binding [GO:0050431]                           |
| cytokine binding [GO:0019955]                                                  | macrophage colony-stimulating factor receptor activity [GO:0005011] | transmembrane receptor protein tyrosine kinase activator activity [GO:0030297] |
| cytokine receptor activity [GO:0004896]                                        | macrophage colony-stimulating factor receptor binding [GO:0005157]  | transmembrane receptor protein tyrosine kinase activity [GO:0004714]           |
| cytokine-mediated signaling pathway [GO:0019221]                               | MAP kinase kinase kinase activity [GO:0004709]                      | transmembrane signaling receptor activity [GO:0004888]                         |
| death receptor agonist activity [GO:0038177]                                   | metal ion binding [GO:0046872]                                      | tumor necrosis factor binding [GO:0043120]                                     |
| double-stranded DNA binding [GO:0003690]                                       | metalloendopeptidase inhibitor activity [GO:0008191]                | tumor necrosis factor receptor activity [GO:0005031]                           |
| enzyme binding [GO:0019899]                                                    | molecular function inhibitor activity [GO:0140678]                  | tumor necrosis factor receptor binding [GO:0005164]                            |
| epidermal growth factor binding [GO:0048408]                                   | negative regulation of neuron death [GO:1901215]                    | type I transforming growth factor beta receptor binding [GO:0034713]           |
| epidermal growth factor receptor binding [GO:0005154]                          | nerve growth factor receptor binding [GO:0005163]                   | type II interferon receptor binding [GO:0005133]                               |
| epidermal growth factor receptor activity [GO:0005006]                         | nuclear receptor coactivator activity [GO:0030374]                  | type II transforming growth factor beta receptor binding [GO:0005114]          |
| fibroblast growth factor receptor binding [GO:0005104]                         | peptidase inhibitor activity [GO:0030414]                           | type III transforming growth factor beta receptor binding [GO:0034714]         |
| fibronectin binding [GO:0001968]                                               | phosphatidylinositol phospholipase C activity [GO:0004435]          | ubiquitin protein ligase binding [GO:0031625]                                  |
| glial cell-derived neurotrophic factor receptor binding [GO:0030116]           | phospholipase activator activity [GO:0016004]                       | vascular endothelial growth factor binding [GO:0038085]                        |
| glycosphingolipid binding [GO:0043208]                                         | platelet-derived growth factor binding [GO:0048407]                 | vascular endothelial growth factor receptor activity [GO:0005021]              |
| granulocyte differentiation [GO:0030851]                                       | platelet-derived growth factor receptor binding [GO:0005161]        | virus receptor activity [GO:0001618]                                           |
| granulocyte macrophage colony-stimulating factor receptor binding [GO:0005129] | positive regulation of actin filament polymerization [GO:0030838]   | zinc ion binding [GO:0008270]                                                  |

Table S1: Molecular functions tagged in 53 proteins detected in hypothermically stored chorion membrane.
